# Supplementary material for: Multifunctional Ag@MOF-5@chitosan non-woven cloth composites for sulfur mustard decontamination and hemostasis
Source: Royal Society of Chemistry journal article supplement (doi:10.1039/c9dt00503j), 2019-01-01
Supplement: c9dt00503j1.pdf [file c9dt00503j1.pdf]

**Supporting information**

**Multifunctional Ag@MOF-5@chitosan non-woven cloth composites for sulfur mustard  
decontamination and haemostasis**

Lin Liu,<sup>a‡</sup> Enming Ping,<sup>a‡</sup> Junmei Sun,<sup>a</sup> Lijuan Zhang,<sup>\*a</sup> Yunshan Zhou,<sup>\*a</sup> Yuxu Zhong,<sup>\*b</sup>  
Yuanyuan Zhou<sup>a</sup> and Yong'an Wang<sup>b</sup>

<sup>a</sup>State Key Laboratory of Chemical Resource Engineering, Institute of Science, Beijing University of Chemical Technology, Beijing 100029, P. R. China; <sup>b</sup>State Key Laboratory of Toxicology and Medical Counter measures, Institute of Pharmacology and Toxicology, Academy of Military Sciences PLA China, Beijing 100850, P. R. China

**Table S1.** The amount of silver and MOF-5 per gram of Ag<sup>m</sup>@MOF-5@ chitosan

| m   | Ag (mg) | MOF-5 (mg) |
|-----|---------|------------|
| 20  | 1.45    | 156.51     |
| 40  | 2.78    | 155.89     |
| 60  | 4.06    | 155.55     |
| 80  | 5.49    | 154.83     |
| 100 | 5.72    | 154.65     |
| 120 | 5.90    | 154.40     |

The silver content increased gradually with the concentration of silver nitrate solution, and the content of MOF-5 slightly reduced.

**Table S2.** Composition of the HD-containing standard solutions.

| Entry | Diluted HD solution (μL) | Petroleum ether (μL) | The blue reagent (μL) | Absolute ethyl alcohol (μL) |
|-------|--------------------------|----------------------|-----------------------|-----------------------------|
| 1     | 0                        | 100                  | 200                   | 100                         |
| 2     | 20                       | 80                   | 200                   | 100                         |
| 3     | 40                       | 60                   | 200                   | 100                         |

|   |     |    |     |     |
|---|-----|----|-----|-----|
| 4 | 60  | 40 | 200 | 100 |
| 5 | 80  | 20 | 200 | 100 |
| 6 | 100 | 0  | 200 | 100 |

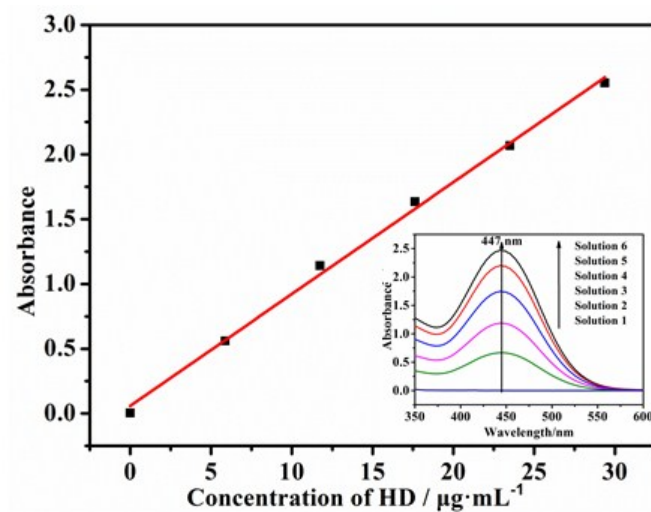

**Fig. S1.** Calibration curve of UV-vis. absorbance of the HD-containing solution. Insert image is UV absorbance of HD standard solution at 445 nm versus concentration of HD.

The standard solution of HD shows a absorption peak at  $\lambda_{\max} = 447$  nm in its UV-visible spectrum (Fig. S1). The calibration curve for the determination of HD is obtained by plotting absorbance ( $\lambda_{\max} = 447$  nm) against the concentration of HD (Table S2 and Fig. S1), with the regression equation  $y = 0.058 + 0.086 x$  ( $R = 0.999$ ), where  $y$  is the absorbance value and  $x$  is the residual concentration of HD.

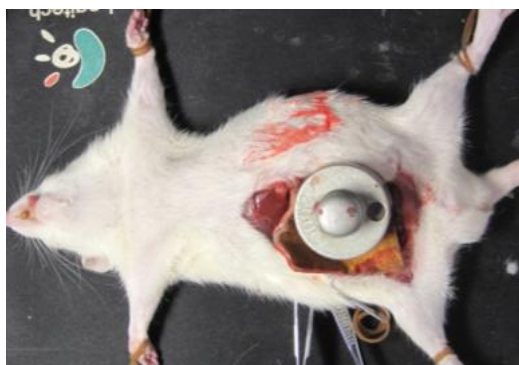

**Fig. S2** Wound model with Wistar rats

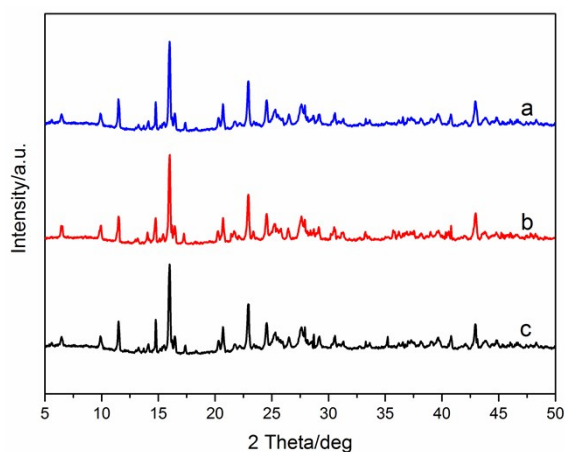

**Fig. S3** Powder XRD patterns of Ag<sup>20</sup>@MOF-5 (line a), Ag<sup>40</sup>@MOF-5 (line b) and Ag<sup>60</sup>@MOF-5 (line c)

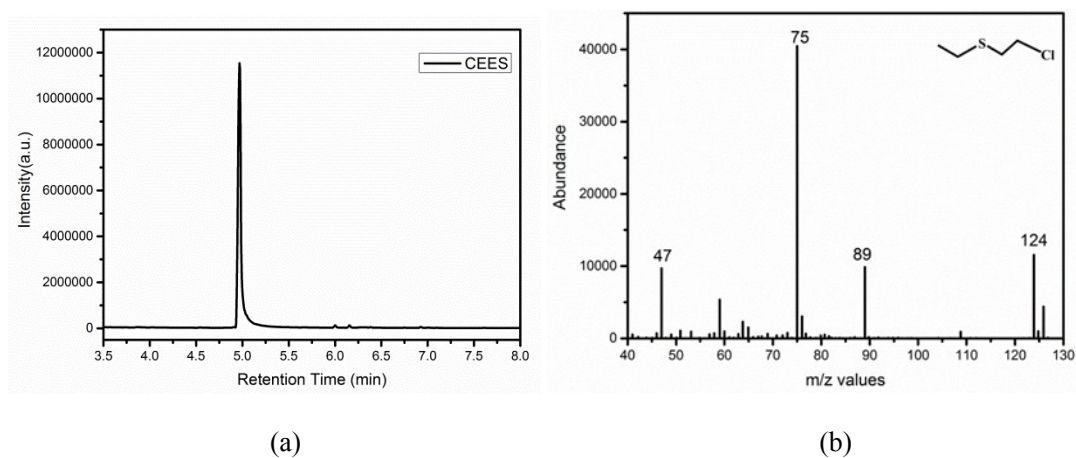

**Fig. S4** GC-MS spectra of the extracted suspension from 2-CEES decontaminated by MOF-5: GC spectrum (a) and mass spectrum for 2-CEES (b). Note: chitosan and MOF-5@chitosan showed

nearly the same spectra.

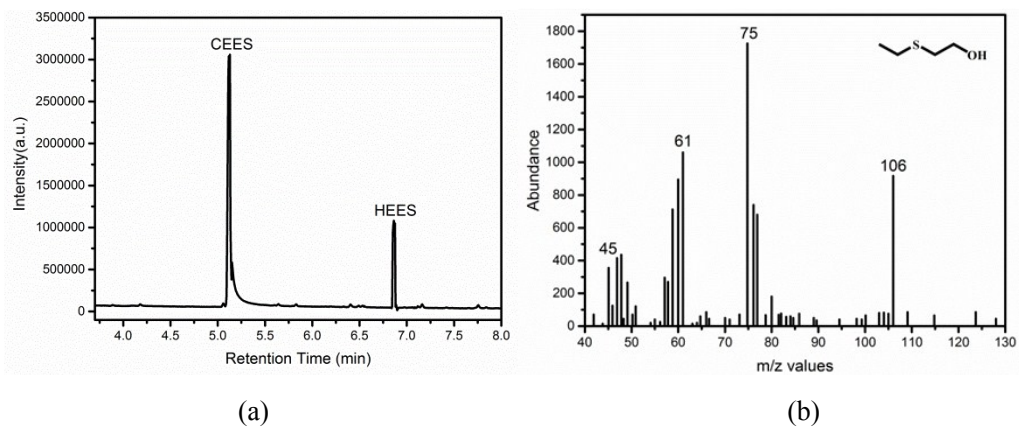

**Fig. S5** The GC–MS spectra of the products extracted from the 2-CEES solution after being decontaminated by  $\text{Ag}^{80}\text{@MOF-5@chitosan}$ : GC spectrum (a), mass spectrum for HEES (b). Note:  $\text{Ag}^{80}\text{@MOF-5}$  showed nearly the same spectra.
